# Supplementary material for: The Active Glucuronide Metabolite of the Brain Protectant IMM-H004 with Poor Blood–Brain Barrier Permeability Demonstrates a High Partition in the Rat Brain via Multiple Mechanisms
Source: MDPI journal article supplement (doi:10.3390/pharmaceutics16030330), 2024-02-27
Supplement: s1 [file s1]

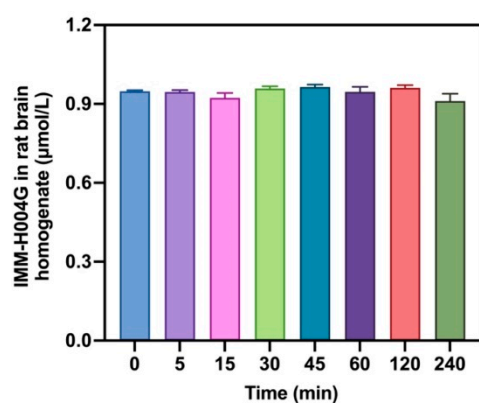

**Figure S1** Incubation of IMM-H004G (1 μmol/L) in rat brain homogenate (2 mg/mL protein) for up to 4 h ( $n=3$ ).

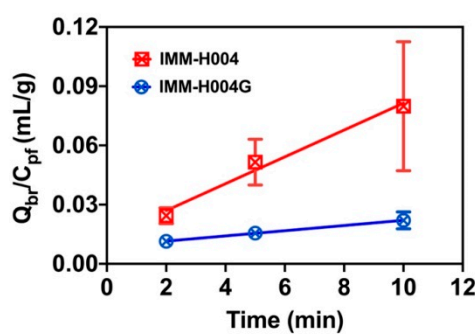

**Figure S2** In situ brain perfusion of IMM-H004 and IMM-H004G (2 μmol/L) in rats for up to 10 min ( $n=3$ ).

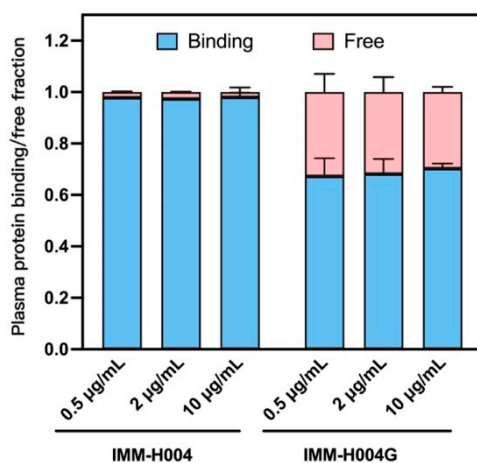

**Figure S3** Rat plasma protein binding and free fractions ( $f_u$  values) of IMM-H004 and IMM-H004G (0.5-10 μg/mL,  $n=3$ ).

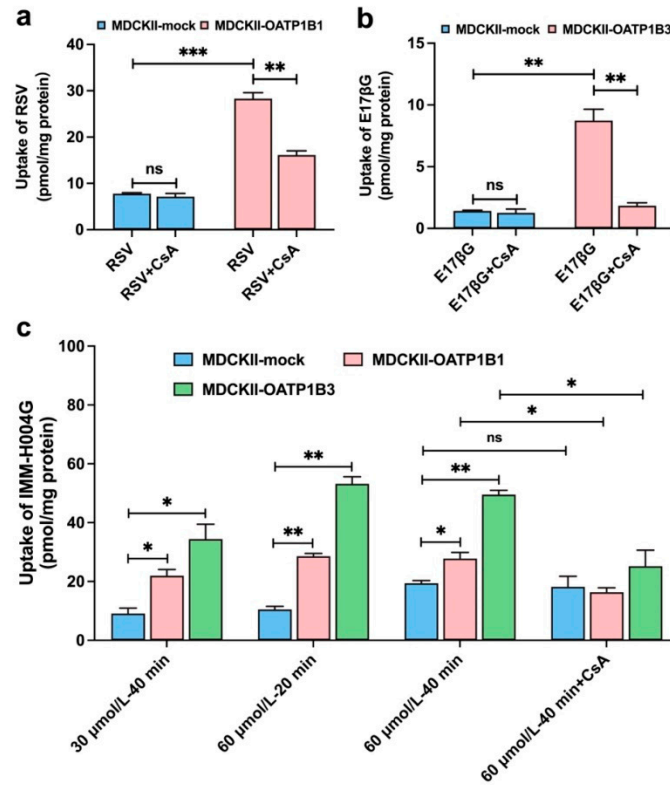

**Figure S4** Uptake of IMM-H004G in MDCKII-OATP1B1 and MDCKII-OATP1B3 cells. (a) RSV (rosuvastatin, 30 μmol/L) is used as a positive group in MDCKII-OATP1B1 cells. (b) E17βG (estradiol-17β-glucuronide, 5 μmol/L) is used as a positive group in MDCKII-OATP1B3 cells. (c) IMM-H004G (30, 60 μmol/L) was incubated with MDCKII-OATP1B1 and MDCKII-OATP1B3 cells for 20 or 40 min. The OATP pan-inhibitor CsA (cyclosporin A) is 10 μmol/L.  $n=3$  for positive substrates, and  $n=2$  for IMM-H004G. \*\*\* $p < 0.001$ , \*\* $p < 0.01$ , \* $p < 0.05$  vs. control group. ns, not significant.
